# Supplementary material for: Monodispersed octahedral-shaped pyrite CuSe2 particles by polyol solution chemical synthesis
Source: Royal Society of Chemistry journal article supplement (doi:10.1039/c3ce41500g), 2013-01-01
Supplement: c3ce41500g.pdf [file c3ce41500g.pdf]

# Monodispersed Octahedral-shaped Pyrite CuSe<sub>2</sub> Particles by Polyol Solution Chemical Synthesis

Tong liu,<sup>a</sup> Zhengguo Jin,<sup>\*a</sup> Jia Li,<sup>a</sup> Jian Wang,<sup>a</sup> Dalong Wang,<sup>a</sup> Junyun Lai,<sup>a</sup> Haiyan Du<sup>b</sup>

<sup>a</sup> School of Materials Science and Engineering, Key Laboratory of Advanced Ceramics and Machining Technology of Ministry of Education, Tianjin University, Tianjin 300072, P. R. China

<sup>b</sup> Analysis and Measurement Center, Tianjin University, Tianjin 300072, P. R. China

**Chemicals:** Copper chloride (CuCl<sub>2</sub>·2H<sub>2</sub>O, 99.0%), selenium powder (Se, 99%), triethylene glycol (C<sub>6</sub>H<sub>14</sub>O<sub>4</sub>, TEG, 99%), triethylenetetramine (C<sub>6</sub>H<sub>18</sub>N<sub>4</sub>, TETA, 70%), polyvinylpyrrolidone (PVP, Mr =10000), absolute ethanol (CH<sub>3</sub>CH<sub>2</sub>OH, 99.7%), and high-purity nitrogen gas. All chemicals were directly used as received.

**Characterization:** X-ray diffraction (XRD) was detected by Rigaku D/Max 2500V/PC X-ray powder diffractometer (Japan) with CuKα radiation source ( $\lambda = 1.54\text{\AA}$ ) operating at 40 kV and 200 mA and a scan rate of 8°/min from  $2\theta = 10^\circ$  to  $90^\circ$ . Morphology and composition were performed by FEI Tecnai G2 F20 field-emission transmission electron microscope with SAED attachment (Netherland) and Hitachi S-4800 field emission scanning electron microscope with EDX attachment (Japan). Raman spectra were carried out on RENISHAW in Via reflex (England). Optical absorption was recorded at wavelength range from 300 nm to 1400 nm by Hitachi U-4100 UV/vis/NIR spectrophotometer (Japan). XPS were carried out on Esca Multiplex Philips-1600 X-ray photoelectron spectrometer (Netherland).

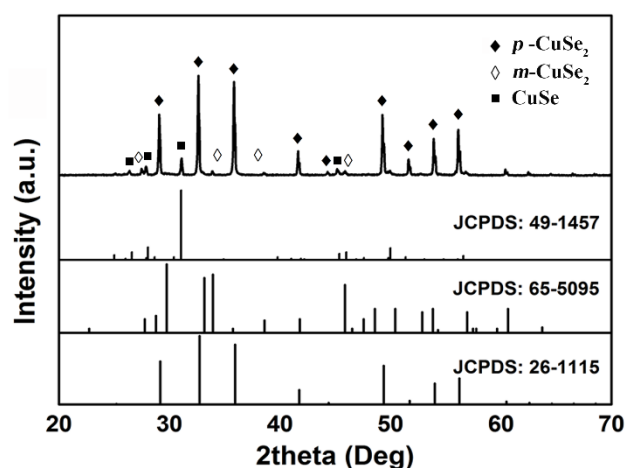

Fig. S1 XRD pattern of sample prepared at 250 °C

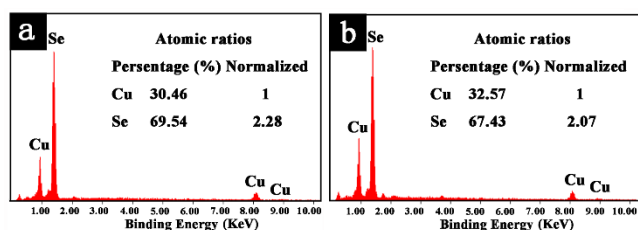

Fig. S2 (a, b) EDX spectra images of products synthesized at 190 °C and 210 °C.

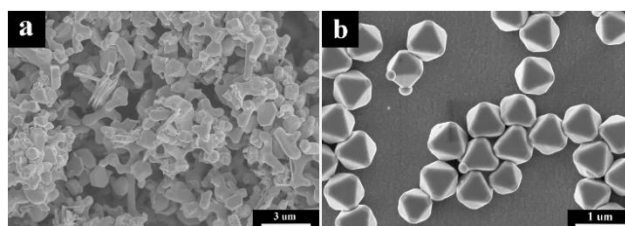

Fig. S3 (a, b) SEM image of product synthesized with PVP adding amount of 0 g and 0.2 g respectively.
